# Supplementary material for: Realizing the high energy density and flexibility of a fabric electrode through hierarchical structure design
Source: Royal Society of Chemistry journal article supplement (doi:10.1039/d2nr03469g), 2022-01-01
Supplement: d2nr03469g1.pdf [file d2nr03469g1.pdf]

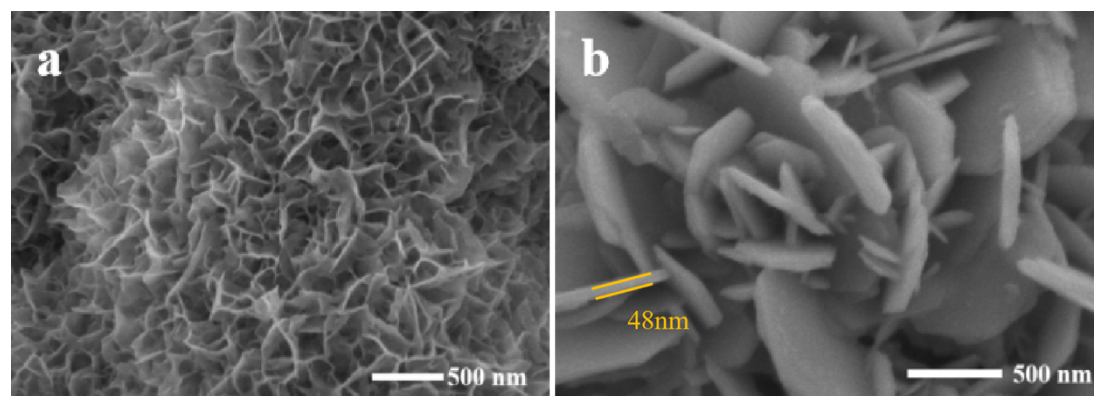

**Fig. S1.** SEM images of the (a) Ni(OH)<sub>2</sub> nanosheets and (b) NiPS<sub>3</sub> nanosheets.

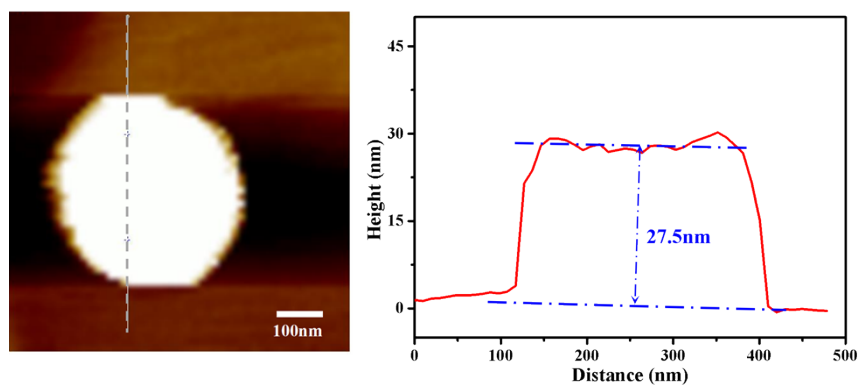

**Fig. S2.** AFM image of NiPS<sub>3</sub> nanosheets.

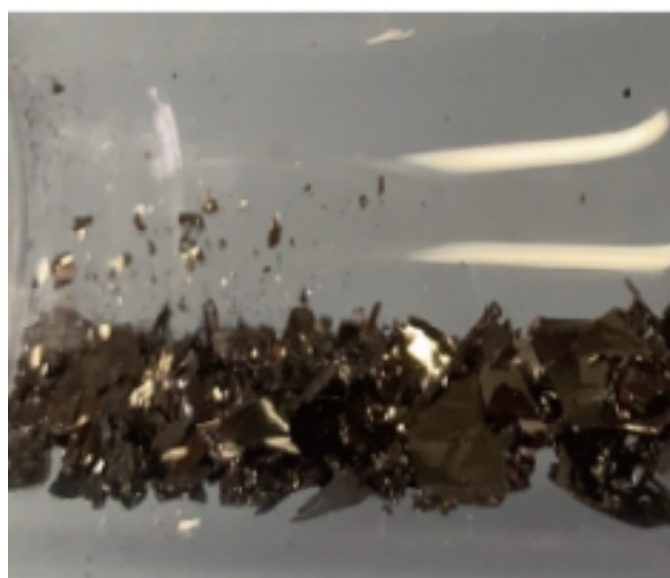

**Fig. S3.** Image of the bulk NiPS<sub>3</sub> synthesized by traditional method. Stoichiometric ratios of Ni, P and S were placed in vacuum ampoules and heated in a dual temperature zone (650°- 700°) tube furnace for five days.

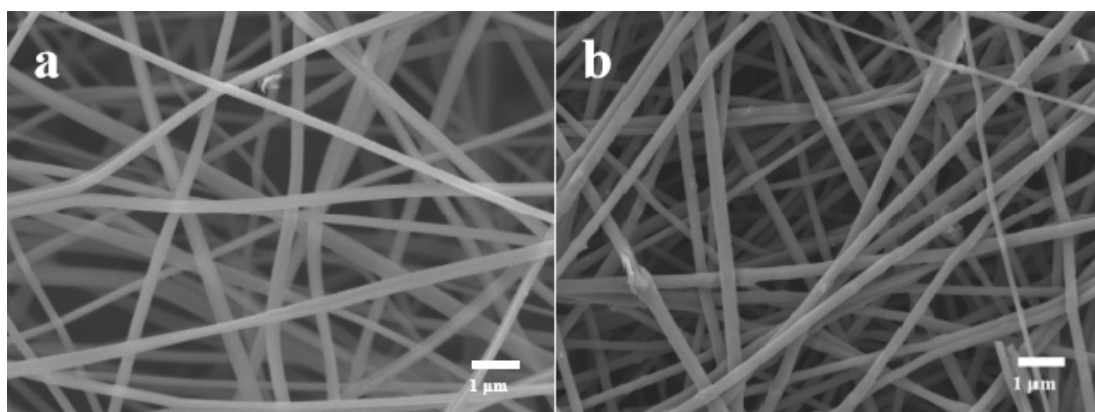

**Fig. S4.** SEM images of the (a) NiPS<sub>3</sub>/CNFs and (b) NCNFs.

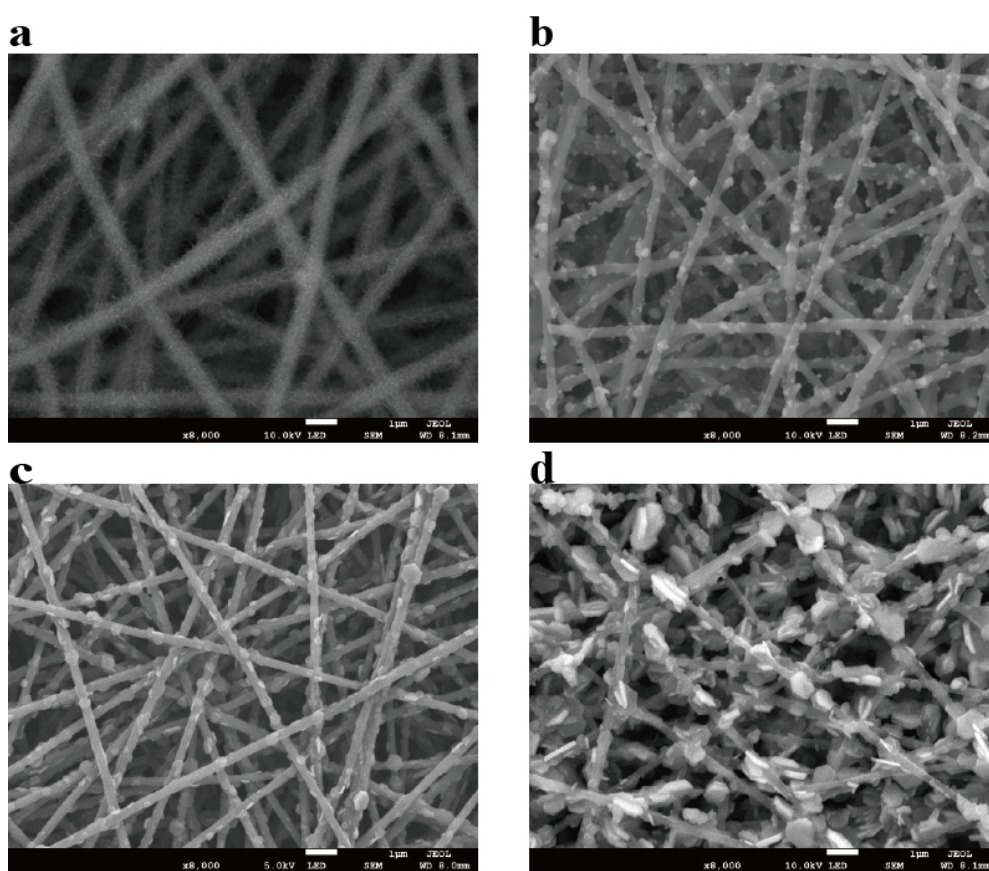

**Fig. S5.** SEM images of the a) Ni(OH)<sub>2</sub>@NCNFs; b) NiPS<sub>3</sub>@NCNFs-1 (0.5mmol NiSO<sub>4</sub>·6H<sub>2</sub>O), c) NiPS<sub>3</sub>@NCNFs-2 (1mmol NiSO<sub>4</sub>·6H<sub>2</sub>O) and d) NiPS<sub>3</sub>@NCNFs-3 (1.5mmol NiSO<sub>4</sub>·6H<sub>2</sub>O). The content of NiPS<sub>3</sub> nanosheets were controlled by the concentration of nickel ions.

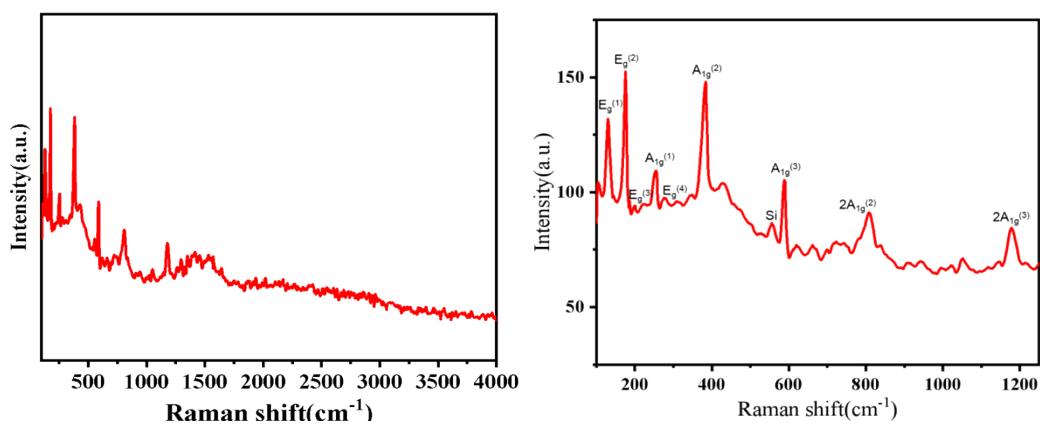

**Fig. S6.** Raman spectrum of NiPS<sub>3</sub>@NCNFs, the Raman light wave number is 532nm.

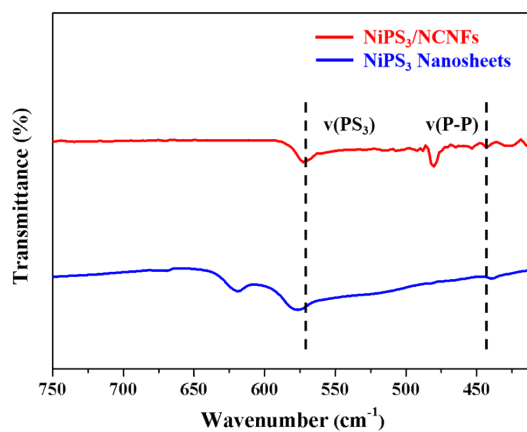

**Fig. S7.** FT-IR spectrum of NiPS<sub>3</sub>@NCNFs.

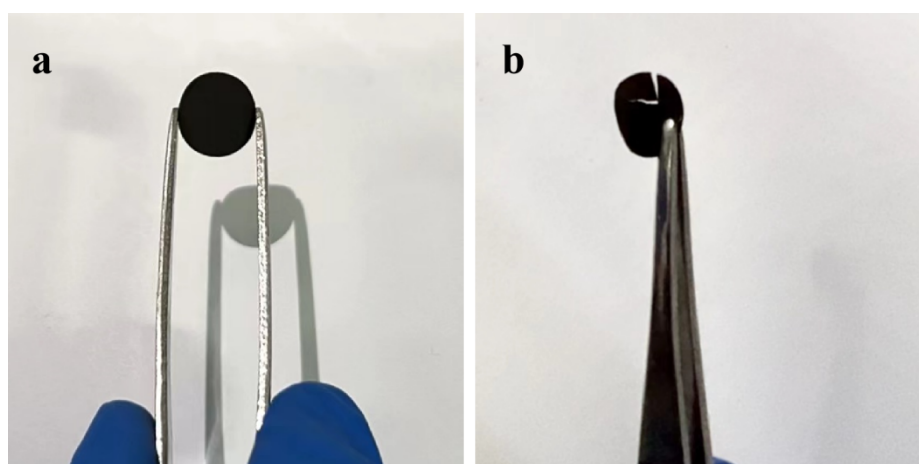

**Fig. S8.** (a) The NiPS<sub>3</sub>@NCNFs after being folded in half for 300 times, (b) the cracked NiPS<sub>3</sub>/CNFs after several folds.

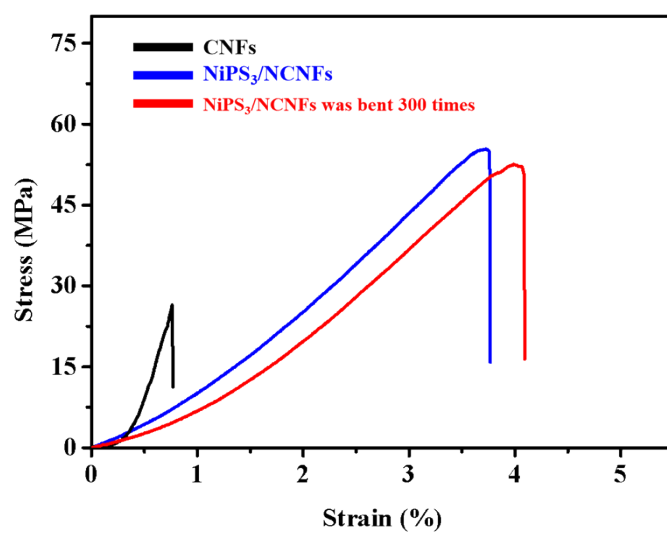

**Fig. S9.** The stress-strain curves of NiPS<sub>3</sub>/CNFs, NCNFs and CNFs.

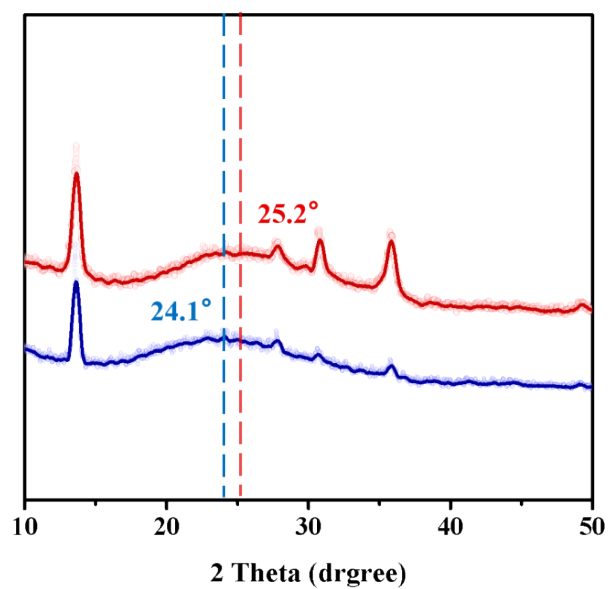

**Fig. S10.** XRD patterns of NiPS<sub>3</sub>@CNFs and NiPS<sub>3</sub>/CNFs.

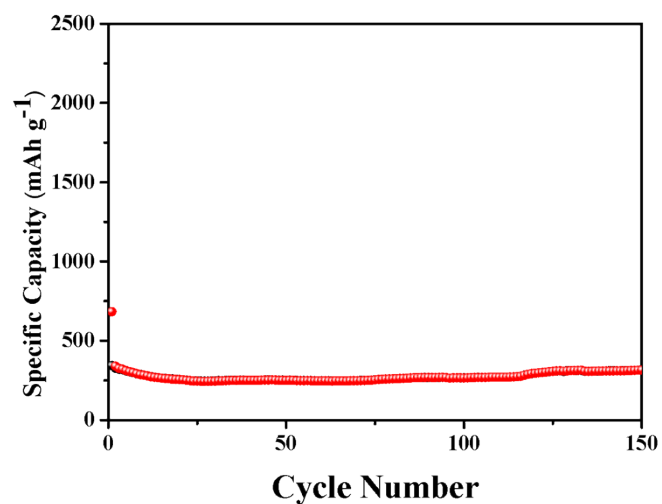

**Fig. S11.** Cycling performance of the NCNFs electrode at 0.1A g<sup>-1</sup>.

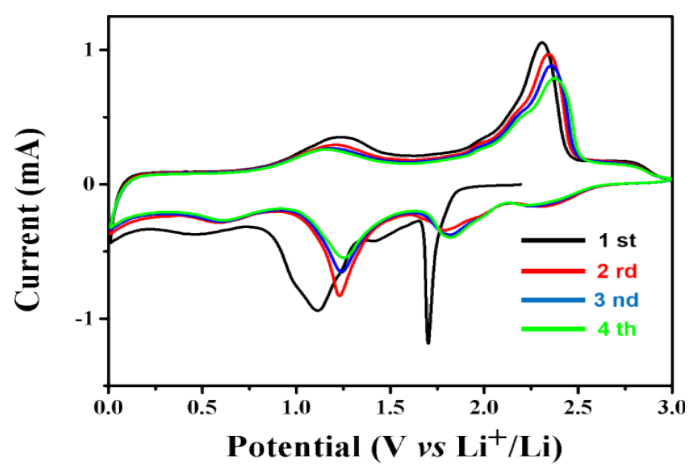

**Fig. S12.** CV curves of the NiPS<sub>3</sub>@NCNFs between 0.01 -3 V at a scan rate 0.1 mV/s.

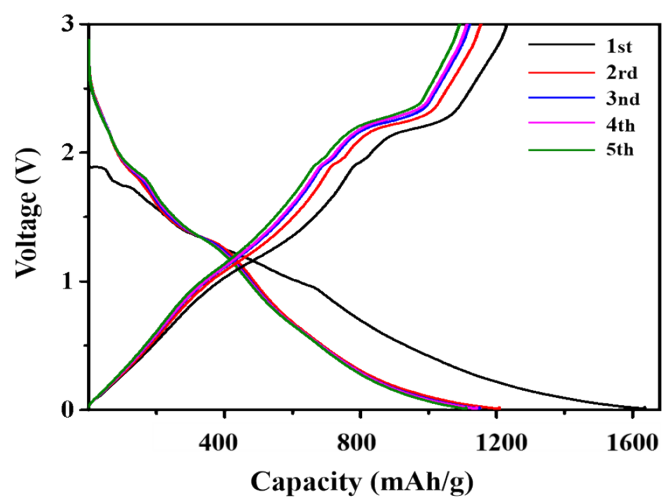

**Fig. S13.** Galvanostatic charge-discharge curves of the NiPS<sub>3</sub>@NCNFs.

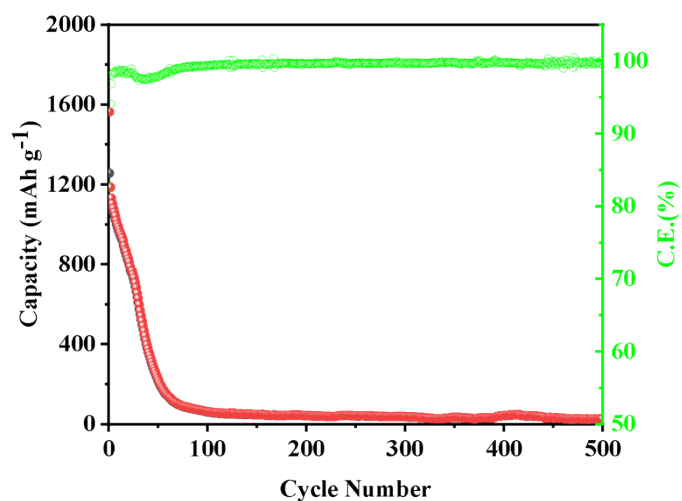

**Fig. S14.** Cycling performance of bulk NiPS<sub>3</sub> electrode at 1A g<sup>-1</sup>.

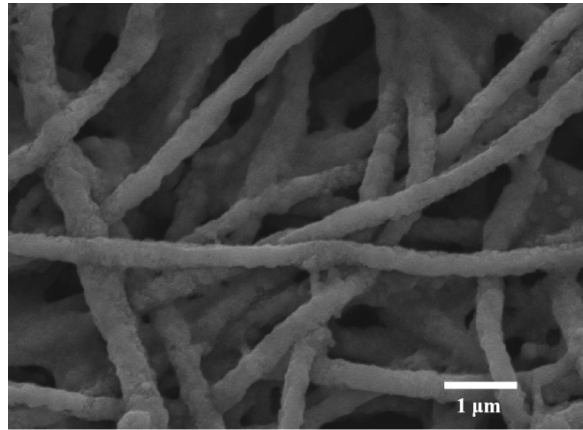

**Fig. S15.** SEM images of the NiPS<sub>3</sub>/NCNFs after 1000 times charge-discharge.

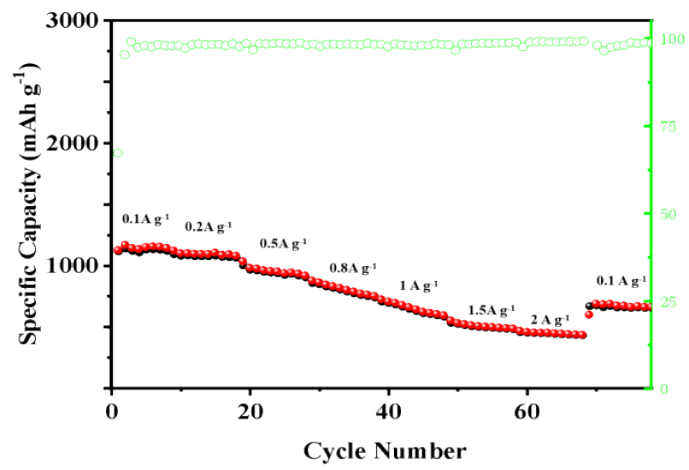

**Fig. S16.** Rate performances of the NiPS<sub>3</sub>@NCNFs.

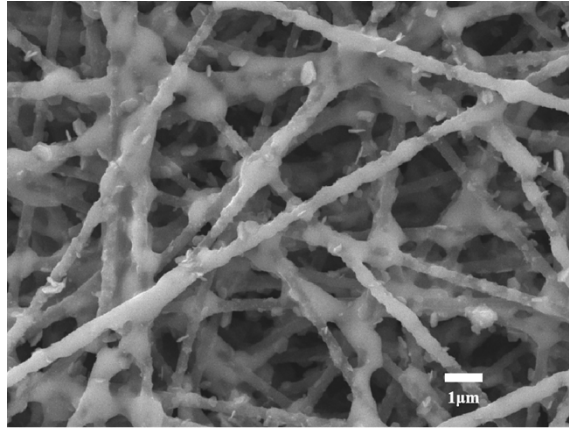

**Fig. S17.** SEM images of the NiPS<sub>3</sub>@NCNFs after 3 times charge-discharge.

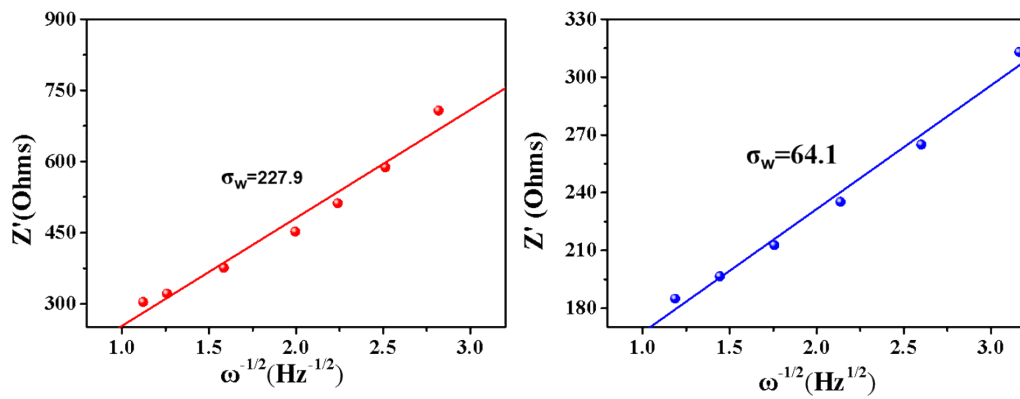

**Fig. S18.** The plot of real part of the impedance ( $Z'$ ) against the inverse square root of the angular momentum.



**Table.S1.** The compositions of the samples were determined by ICP. 1 mg sample was first dissolved in hot concentrated nitric acid, and the solution was diluted to 100 mL. A standard solution with Ni<sup>2+</sup> concentration of 0.5, 1, 1.5, 2, and 2.5 ppm were prepared to get the standard curve.

| Samples                    | Nickel ion concentration | Nickel ion content (per mg in electrode) | NiPS <sub>3</sub> content (wt%) |
|----------------------------|--------------------------|------------------------------------------|---------------------------------|
| NiPS <sub>3</sub> @NCNFs-1 | 0.806mg/L                | 0.0806mg                                 | 25.52%                          |
| NiPS <sub>3</sub> @NCNFs-2 | 1.088mg/L                | 0.1088mg                                 | 34.45%                          |
| NiPS <sub>3</sub> @NCNFs-3 | 2.147mg/L                | 0.2147mg                                 | 67.99%                          |
| NiPS <sub>3</sub> /CNFs    | 1.654mg/L                | 0.1654mg                                 | 52.37%                          |
| NiPS <sub>3</sub> /NCNFs   | 1.248mg/L                | 0.1248mg                                 | 39.52%                          |

**Table.S2.** Comparison of NiPS<sub>3</sub>/NCNFs with other reported freestanding carbon-based electrodes.

| Material                              | Morphology                                    | Flexibility                       | Specific capacity (mAh g <sup>-1</sup> ) /Current density (A g <sup>-1</sup> ) | Retention capacity (mAh g <sup>-1</sup> ) /Cycling number /Current density (A g <sup>-1</sup> ) |
|---------------------------------------|-----------------------------------------------|-----------------------------------|--------------------------------------------------------------------------------|-------------------------------------------------------------------------------------------------|
| NiPS <sub>3</sub> /NCNFs (This work)  | NiPS <sub>3</sub> nanosheets embedded in CNF  | Folded 300 times without creases  | 2156.2/0.1                                                                     | 893.5/1000/1                                                                                    |
| SnO <sub>2</sub> /CNF <sup>1</sup>    | SnO <sub>2</sub> nanoparticle embedded in CNF | Demonstrate flexible by image     | 1293/0.1                                                                       | 754/300/1                                                                                       |
| Porous CNF <sup>2</sup>               | Carbon nanofibers                             | Could be bent without breaking    | 405/0.03                                                                       | 380/200/0.03                                                                                    |
| MoS <sub>2</sub> /CNF <sup>3</sup>    | MoS <sub>2</sub> nanosheets on CNF            | Could be bent without breaking    | 1200/0.1                                                                       | 670/200/0.5                                                                                     |
| NiS/CNF <sup>4</sup>                  | NiS nanoparticles on CNF                      | Demonstrate flexibility by images | 1769/0.1                                                                       | 1021/100/0.1                                                                                    |
| SC-NF <sup>5</sup>                    | core-shell Si/C nanofiber                     | Demonstrate flexibility by images | 1638/0.1                                                                       | 720/200/0.5                                                                                     |
| SnS/C <sup>6</sup>                    | SnS nanoparticles on CNF                      | Demonstrate flexibility by images | 1278/0.1                                                                       | 330/1000/0.8                                                                                    |
| FeP@C <sup>7</sup>                    | FeP nanotubes on CNF                          | Could be bent without breaking    | 1350/0.1                                                                       | 500/1100/1.5                                                                                    |
| MnOQD/CNT <sup>8</sup>                | MnO quantum dots on CNT                       | Demonstrate flexibility by images | 1361/0.1                                                                       | 883/1000/1                                                                                      |
| SHCM/NCF <sup>9</sup>                 | Si nanodots dispersed in carbon               | Bent 180° without breaking        | 2583/0.1                                                                       | 1442/800/1                                                                                      |
| NiCoPS <sub>3</sub> /NC <sup>10</sup> | Cubic-like structure                          | Brittle                           | 1312/0.1                                                                       | 831/1200/2                                                                                      |

## References

1. L. Xia, S. Wang, G. Liu, L. Ding, D. Li, H. Wang and S. Qiao, *Small*, 2016, **12**, 853-859.
2. L. Tao, Y. Huang, Y. Zheng, X. Yang, C. Liu, M. Di, S. Larpkiattaworn, M. R. Nimlos and Z. Zheng, *J. Taiwan Inst. Chem. E.*, 2019, **95**, 217-226.
3. J. Wang, R. Zhou, D. Jin, K. Xie and B. Wei, *Electrochim. Acta*, 2017, **231**, 396-402.
4. L. Zhang, Y. Huang, Y. Zhang, H. Gu, W. Fan and T. Liu, *Advanced Materials Interfaces*, 2016, **3**, 1500467.
5. W. Li, J. Peng, H. Li, Z. Wu, Y. Huang, B. Chang, X. Guo, G. Chen and X. Wang, *ACS Applied Energy Materials*, 2021, **4**, 8529-8537.

6. J. Xia, L. Liu, S. Jamil, J. Xie, H. Yan, Y. Yuan, Y. Zhang, S. Nie, J. Pan, X. Wang and G. Cao, *Energy Storage Materials*, 2019, **17**, 1-11.
7. X. J. Xu, J. Liu, Z. B. Liu, Z. S. Wang, R. Z. Hu, J. W. Liu, L. Z. Ouyang and M. Zhu, *Small*, 2018, **14**, e1800793.
8. S. Huang, L. Yang, M. Gao, Q. Zhang, G. Xu, X. Liu, J. Cao and X. Wei, *Electrochim. Acta*, 2019, **319**, 302-311.
9. R. Zhu, Z. Wang, X. Hu, X. Liu and H. Wang, *Adv. Funct. Mater.*, 2021, **31**, 2101487.
10. Q. Gui, Y. Feng, B. Chen, F. Gu, L. Chen, S. Meng, M. Xu, M. Xia, C. Zhang and J. Yang, *Adv. Energy Mater.*, 2021, **11**, 2003553.
